# Supplementary material for: Metallic Sb nanoparticles embedded into a yolk–shell Sb2O3@TiO2 composite as anode materials for lithium ion batteries
Source: Royal Society of Chemistry journal article supplement (doi:10.1039/c9nj05947d), 2020-01-01
Supplement: c9nj05947d1.pdf [file c9nj05947d1.pdf]

## Metallic Sb nanoparticles embedded into yolk-shell $\text{Sb}_2\text{O}_3@\text{TiO}_2$ composite as anode materials for lithium ion batteries

Qigang Han<sup>a,b</sup>, Yalan Sheng<sup>a</sup>, Zhiwu Han<sup>c\*</sup>, Xiang Li<sup>a</sup>, Wenqiang Zhang<sup>a</sup>, Yao Li<sup>a</sup>,  
Xu Zhang<sup>a</sup>

<sup>a</sup> Roll Forging Research Institute, School of Materials Science and Engineering (Key Laboratory of Automobile Materials, Ministry of Education) Jilin University, Changchun 130022, P. R. China

<sup>b</sup> State Key Laboratory of Automotive Simulation and Control, Jilin University, Changchun 130022, P. R. China

<sup>c</sup> Key Laboratory of Bionic Engineering (Ministry of Education), Jilin University, Changchun 130022, Jilin, P. R. China

\* Corresponding author.

E-mail address: [zwhan@jlu.edu.cn](mailto:zwhan@jlu.edu.cn) (Zhiwu Han). Tel. / fax: +86 431 85094340

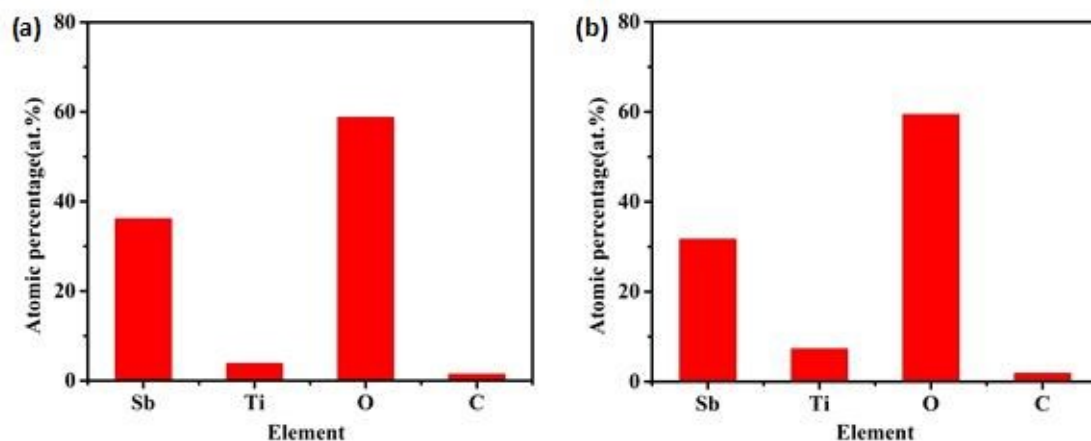

Fig. S1 The atomic percentage of (a)  $\text{Sb}_2\text{O}_3/\text{Sb}@\text{TiO}_2$ -1 and (b)  $\text{Sb}_2\text{O}_3/\text{Sb}@\text{TiO}_2$ -2 composites.

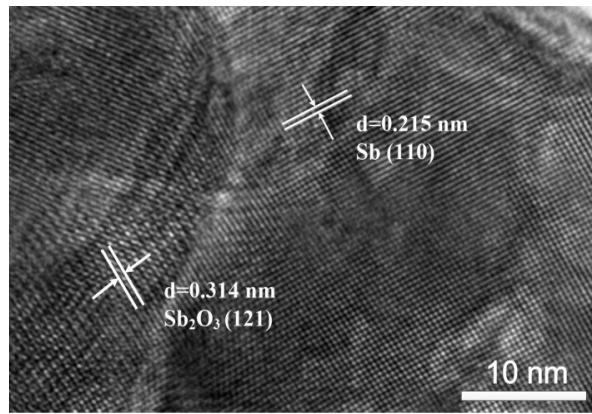

Fig. S2 HRTEM image of the  $\text{Sb}_2\text{O}_3/\text{Sb}@\text{TiO}_2-1$  composite.

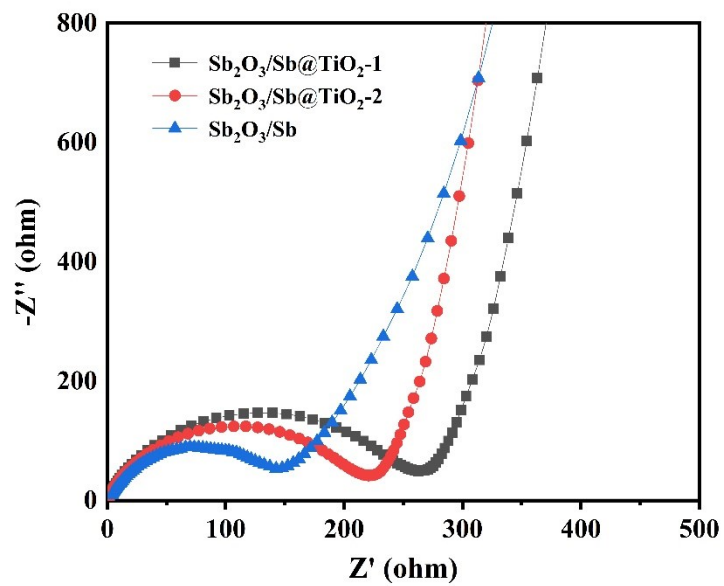

Fig. S3 Electrochemical impedance spectra of  $\text{Sb}_2\text{O}_3/\text{Sb}$ ,  $\text{Sb}_2\text{O}_3/\text{Sb}@\text{TiO}_2-1$  and  $\text{Sb}_2\text{O}_3/\text{Sb}@\text{TiO}_2-2$  composites.

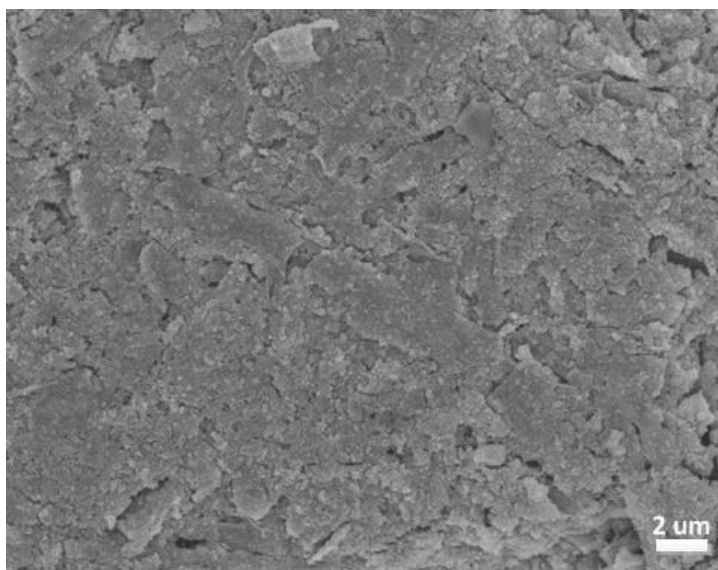

Fig. S4 The SEM image of the Sb<sub>2</sub>O<sub>3</sub>/Sb@TiO<sub>2</sub>-2 composite after 100 cycles at a current density of 100 mA g<sup>-1</sup>.
